# Supplementary material
Source: MDPI journal article supplement (https://www.mdpi.com/2571-6255/6/3/105)
Supplement: s1 [file s1]

Table S1. Fit statistics, test statistics, estimated thresholds, and estimated slopes of line segments for models with zero, one or two thresholds to describe changes in CP and NDF in Gulf cordgrass and seacoast bluestem after winter or summer burning on the East Foundation's El Sauz Ranch in Willacy and Kenedy Counties, Texas, in 2016. Estimated equations provided at the bottom of the table.

| No. of thresholds                                          | k | AICc  | BIC   | $r^2$ | $r_a^2$ | $r_p^2$ | Model                    | Threshold               |                         | First segment           |                  | Second segment          |                  | Third segment           |                  |
|------------------------------------------------------------|---|-------|-------|-------|---------|---------|--------------------------|-------------------------|-------------------------|-------------------------|------------------|-------------------------|------------------|-------------------------|------------------|
|                                                            |   |       |       |       |         |         | $F(df)$<br>$P$           | 1 <sup>st</sup><br>(se) | 2 <sup>nd</sup><br>(se) | $\hat{\beta}_1$<br>(se) | $t$<br>$P$ value | $\hat{\beta}_2$<br>(se) | $t$<br>$P$ value | $\hat{\beta}_3$<br>(se) | $t$<br>$P$ value |
| <i>Gulf cordgrass: Winter crude protein (%):</i>           |   |       |       |       |         |         |                          |                         |                         |                         |                  |                         |                  |                         |                  |
| 2                                                          | 7 | 208.2 | 220.9 | 0.66  | 0.64    | 0.61    | 37.2 (3, 57)<br><0.0001  | 6.4<br>(0.7)            | 29.7<br>(2.9)           | 2.035<br>(0.668)        | 3.0<br>0.0035    | 0.155<br>(0.026)        | 5.9<br><0.0001   | -0.098<br>(0.010)       | -9.4<br><0.0001  |
| 1                                                          | 5 | 210.6 | 220.1 | 0.62  | 0.61    | 0.57    | 47 (2, 58)<br>< 0.0001   | 28.4<br>(2.4)           | —                       | 0.199<br>(0.026)        | 7.6<br><0.0001   | -0.098<br>(0.0103)      | -9.5<br><0.0001  | —                       | —                |
| 0                                                          | 3 | 257.8 | 263.7 | 0.11  | 0.09    | 0.04    | 7.1 (1, 59)<br>0.0102    | —                       | —                       | -0.024<br>(0.009)       | -2.7<br>0.0101   | —                       | —                | —                       | —                |
| <i>Gulf cordgrass: Summer crude protein (%):</i>           |   |       |       |       |         |         |                          |                         |                         |                         |                  |                         |                  |                         |                  |
| 1                                                          | 5 | 181.6 | 189.3 | 0.45  | 0.43    | 0.38    | 17.8 (2, 43)<br>< 0.0001 | 28<br>(6.9)             | —                       | 0.058<br>(0.041)        | 1.4<br>0.1621    | -0.086<br>(0.015)       | -5.7<br><0.0001  | —                       | —                |
| 0                                                          | 3 | 184.8 | 189.7 | 0.35  | 0.33    | 0.29    | 23.5 (1, 44)<br>< 0.0001 | —                       | —                       | -0.055<br>(0.011)       | -4.8<br><0.0001  | —                       | —                | —                       | —                |
| 2                                                          | 7 | 185.6 | 195.6 | 0.47  | 0.43    | 0.37    | 12.4 (3, 42)<br>< 0.0001 | 29.5<br>(5.3)           | 34.0<br>(6.8)           | 0.087<br>(0.049)        | 1.8<br>0.0821    | -0.348<br>(0.204)       | -1.7<br>0.0957   | -0.072<br>(0.0200)      | -3.6<br>0.0008   |
| <i>Seacoast little bluestem: Winter crude protein (%):</i> |   |       |       |       |         |         |                          |                         |                         |                         |                  |                         |                  |                         |                  |
| 2                                                          | 7 | 95.2  | 98.9  | 0.82  | 0.80    | 0.67    | 35.1 (3, 23)<br>< 0.0001 | 11.3<br>(1.2)           | 27.1<br>(4.7)           | 0.848<br>(0.161)        | 5.3<br><0.0001   | -0.308<br>(0.054)       | -5.7<br><0.0001  | -0.035<br>(0.014)       | -2.6<br>0.0171   |
| 1                                                          | 5 | 99.6  | 103.5 | 0.73  | 0.71    | 0.30    | 32.2 (2, 24)<br>< 0.0001 | 6.1<br>(0.3)            | —                       | 4.8<br>(1.22)           | 3.9<br>0.0006    | -0.076<br>(0.010)       | -7.8<br><0.0001  | —                       | —                |
| 0                                                          | 3 | 107.7 | 110.6 | 0.55  | 0.53    | 0.47    | 30.5 (1, 25)<br>< 0.0001 | —                       | —                       | -0.064<br>(0.012)       | -5.5<br>< 0.0001 | —                       | —                | —                       | —                |
| <i>Seacoast little bluestem: Summer crude protein (%):</i> |   |       |       |       |         |         |                          |                         |                         |                         |                  |                         |                  |                         |                  |
| 2                                                          | 7 | 78.9  | 80.2  | 0.59  | 0.48    | 0.39    | 9.1 (3, 19)<br>0.0006    | 31.0<br>(8.7)           | 78<br>(5.0)             | 0.075<br>(0.036)        | 2.60<br>0.0529   | -0.024<br>(0.015)       | -1.59<br>0.1293  | -0.241<br>(0.072)       | -3.3<br>(0.0034) |
| 1                                                          | 5 | 77.5  | 80.0  | 0.46  | 0.41    | 0.32    | 8.7 (2, 20)<br>0.0019    | 60<br>(8.4)             | —                       | 0.02<br>(0.01)          | 1.2<br>0.2574    | -0.12<br>(0.030)        | -3.9<br>0.0008   | —                       | —                |
| 0                                                          | 3 | 84.3  | 86.8  | 0.23  | 0.19    | 0.06    | 6.4 (1, 22)<br>0.0189    | —                       | —                       | -0.025<br>(0.010)       | -2.5<br>0.019    | —                       | —                | —                       | —                |

Table S1, continued.

| No. of thresholds                                                           | k | AICc  | BIC   | $r^2$ | $r_a^2$ | $r_p^2$ | Model<br>$F(df)$<br>$P$  | Threshold               |                         | First segment           |                  | Second segment          |                  | Third segment           |                  |
|-----------------------------------------------------------------------------|---|-------|-------|-------|---------|---------|--------------------------|-------------------------|-------------------------|-------------------------|------------------|-------------------------|------------------|-------------------------|------------------|
|                                                                             |   |       |       |       |         |         |                          | 1 <sup>st</sup><br>(se) | 2 <sup>nd</sup><br>(se) | $\hat{\beta}_1$<br>(se) | $t$<br>$P$ value | $\hat{\beta}_2$<br>(se) | $t$<br>$P$ value | $\hat{\beta}_3$<br>(se) | $t$<br>$P$ value |
| <u><i>Gulf cordgrass: Winter neutral detergent fiber (%):</i></u>           |   |       |       |       |         |         |                          |                         |                         |                         |                  |                         |                  |                         |                  |
| 2                                                                           | 7 | 157.4 | 164.7 | 0.75  | 0.73    | 0.69    | 32.5 (3, 32)<br>< 0.0001 | 19<br>(3.1)             | 47<br>(6.1)             | -0.559<br>(0.097)       | -5.7<br><0.0001  | -0.035<br>(0.041)       | -0.85<br>0.4014  | 0.218<br>(0.032)        | 6.7<br><0.0001   |
| 1                                                                           | 5 | 162.7 | 168.8 | 0.66  | 0.61    | 0.42    | 32.3 (2, 33)<br>< 0.0001 | 28<br>(2.4)             | —                       | -0.377<br>(0.056)       | -6.8<br>0.0001   | 0.146<br>(0.020)        | 7.2<br>0.0001    | —                       | —                |
| 0                                                                           | 3 | 194.4 | 198.4 | 0.06  | 0.03    | -0.07   | 2.2 (1, 34)<br>0.1497    | —                       | —                       | 0.035<br>(0.024)        | 1.5<br>0.1497    | —                       | —                | —                       | —                |
| <u><i>Gulf cordgrass: Summer neutral detergent fiber (%):</i></u>           |   |       |       |       |         |         |                          |                         |                         |                         |                  |                         |                  |                         |                  |
| 1                                                                           | 5 | 128.8 | 132.7 | 0.35  | 0.30    | 0.13    | 6.5 (2, 24)<br>0.0056    | 23.6<br>(6.0)           | —                       | -0.204<br>(0.090)       | -2.3<br>0.0334   | 0.096<br>(0.027)        | 3.6<br>0.0016    | —                       | —                |
| 0                                                                           | 3 | 130.8 | 133.8 | 0.17  | 0.10    | <0.01   | 3.9 (1, 25)<br>0.0578    | —                       | —                       | 0.044<br>(0.022)        | 2.0<br>0.0578    | —                       | —                | —                       | —                |
| 2                                                                           | 7 | 130.9 | 134.6 | 0.45  | 0.38    | 0.26    | 6.4 (3,23)<br>0.0027     | 25<br>(5.3)             | 70.8<br>(6.3)           | -0.218<br>(0.079)       | -2.7<br>0.0111   | 0.145<br>(0.034)        | 4.2<br>0.0003    | -0.255<br>(0.171)       | -1.5<br>0.1493   |
| <u><i>Seacoast little bluestem: Winter Neutral detergent fiber (%):</i></u> |   |       |       |       |         |         |                          |                         |                         |                         |                  |                         |                  |                         |                  |
| 2                                                                           | 7 | 167.0 | 174.3 | 0.55  | 0.51    | 0.41    | 12.9 (3, 32)<br>< 0.0001 | 11.0<br>(2.7)           | 21.2<br>(2.9)           | -1.151<br>(0.347)       | -3.3<br>0.0027   | 0.657<br>(0.145)        | 4.5<br>0.0001    | 0.032<br>(0.018)        | 1.8<br>0.0889    |
| 1                                                                           | 5 | 174.5 | 180.5 | 0.34  | 0.31    | 0.18    | 8.7 (2, 33)<br>0.0009    | 29<br>(12.2)            | —                       | 0.162<br>(0.062)        | 2.6<br>0.0142    | 0.036<br>(0.0245)       | 1.5<br>0.1506    | —                       | —                |
| 0                                                                           | 3 | 172.1 | 176.1 | 0.29  | 0.27    | 0.21    | 14.1 (1, 34)<br>0.0007   | —                       | —                       | 0.064<br>(0.017)        | 3.8<br>0.0007    | —                       | —                | —                       | —                |
| <u><i>Seacoast little bluestem: Summer Neutral detergent fiber (%):</i></u> |   |       |       |       |         |         |                          |                         |                         |                         |                  |                         |                  |                         |                  |
| 0                                                                           |   | 144.4 | 147.6 | 0.17  | 0.14    | 0.07    | 5.5 (1, 27)<br>0.0265    |                         |                         | 0.056<br>(0.024)        | 2.3<br>0.0265    |                         |                  |                         |                  |
| 1                                                                           |   | 148.1 | 152.5 | 0.22  | 0.16    | 0.04    | 3.7 (2, 26)<br>0.0391    | 31<br>(14.3)            | —                       | -0.038<br>(0.076)       | -0.5<br>0.6178   | 0.0919<br>(0.036)       | 2.5<br>0.0176    | —                       | —                |
| 2 <sup>1/</sup>                                                             |   | —     | —     | —     | —       | —       |                          | —                       | —                       | —                       | —                | —                       | —                | —                       | —                |

<sup>1/</sup> No thresholds estimated

Continuous 1-threshold model:

$$Y_i = \beta_0 + \gamma_1 D + \gamma_2 (D - T)X_2 + e_i, \text{ where } X_2 = \begin{cases} 1 & \text{if } D > T \\ 0 & \text{if } D \leq T \end{cases}; D = \text{days after burn, and } T = \text{estimated threshold.}$$

$$\text{Gulf cordgrass winter protein: } \hat{Y}_i = 9.90024 + 0.19859D - 0.29668(D - 28.4)X_2$$

$$\text{Gulf cordgrass summer protein: } \hat{Y}_i = 13.70641 + 0.05781D - 0.14388(D - 28.0)X_2$$

$$\text{Seacoast little bluestem winter protein: } \hat{Y}_i = -14.830 + 4.805D - 4.881(D - 6.1157)X_2$$

$$\text{Seacoast little bluestem summer protein: } \hat{Y}_i = 10.64637 + 0.01731D - 0.11764(D - 60)X_2$$

$$\text{Gulf cordgrass winter neutral detergent fiber: } \hat{Y}_i = 76.69798 - 0.37678D + 0.52292(D - 28)X_2$$

$$\text{Gulf cordgrass summer neutral detergent fiber: } \hat{Y}_i = 72.2478 - 0.20395D + 0.29991(D - 23.6)X_2$$

$$\text{Seacoast little bluestem winter neutral detergent fiber: } \hat{Y}_i = 67.18693 + 0.16179D - 0.12568(D - 29)X_2$$

$$\text{Seacoast little bluestem summer neutral detergent fiber: } \hat{Y}_i = 69.15232 - 0.03836D + 0.13027(D - 31)X_2$$

Continuous 2-threshold model:

$$Y_i = \beta_0 + \gamma_1 D + \gamma_2 (D - T_1)X_2 + \gamma_3 (D - T_2)X_3 + e_i, \text{ where } X_2 = \begin{cases} 1 & \text{if } D > T_1 \\ 0 & \text{if } D \leq T_1 \end{cases} \text{ and } X_3 = \begin{cases} 1 & \text{if } D > T_2 \\ 0 & \text{if } D \leq T_2 \end{cases}; D = \text{days after burn; and}$$

$T_1$  and  $T_2$  = estimated thresholds.

$$\text{Gulf cordgrass winter protein: } \hat{Y}_i = -1.26000 + 2.03500D - 1.87970(D - 6.411064)X_2 - 0.25339(D - 29.73537)X_3$$

$$\text{Gulf cordgrass summer protein: } \hat{Y}_i = 13.35001 + 0.087134D - 0.43518(D - 29.49)X_2 + 0.27637(D - 33.96)X_3$$

$$\text{Seacoast little bluestem winter protein: } \hat{Y}_i = 6.60232 + 0.84848D - 1.1568478(D - 11.338)X_2 + 0.2729415(D - 27.118)X_3$$

$$\text{Seacoast little bluestem summer protein: } \hat{Y}_i = 9.46793 + 0.07527D - 0.09939(D - 31.0)X_2 - 0.21723(D - 78)X_3$$

$$\text{Gulf cordgrass winter neutral detergent fiber: } \hat{Y}_i = 78.72749 - 0.55859D + 0.52359(D - 19.00)X_2 + 0.25308(D - 46.964)X_3$$

$$\text{Gulf cordgrass summer neutral detergent fiber: } \hat{Y}_i = 72.40914 - 0.21801D + 0.36305(D - 25)X_2 - 0.39990(D - 70.78719)X_3$$

$$\text{Seacoast little bluestem winter neutral detergent fiber: } \hat{Y}_i = 77.7127 - 1.1512D + 1.8083(D - 11)X_2 - 0.6249(D - 21.22912)X_3$$

$$\text{Seacoast little bluestem summer neutral detergent fiber: no thresholds estimated}$$

# EXAMPLES OF HOW TO USE TABLE S1 AND A 2-THRESHOLD MODEL

Gulf cordgrass, CP, winter burn:

$$T_1 = 6.411064; T_2 = 29.73537$$

- For ***D* = 5** days post-burning: (**bold-faced value of 5** to be inserted in eq. 1, below)

$X_2 = 0$  because  $D \leq T_1$  and  $X_3 = \underline{0}$  because  $D \leq T_2$  (*italicized values of 0 and  $\underline{0}$  to be inserted in eq. 1, below*):

$$\hat{Y}_i = -1.26000 + 2.03500 \times \mathbf{5} - 1.87970(\mathbf{5} - 6.411064) \times 0 - 0.25339(\mathbf{5} - 29.73537) \times \underline{0} = \underline{8.915} \quad \text{Eq. 1}$$

- For ***D* = 20** days post-burning: (**bold-faced value of 20** to be inserted in eq. 2, below)

$X_2 = 1$  because  $D > T_1$  and  $X_3 = \underline{0}$  because  $D \leq T_2$  (*italicized values of 1 and  $\underline{0}$  to be inserted in eq. 2, below*):

$$\hat{Y}_i = -1.26000 + 2.03500 \times \mathbf{20} - 1.87970(\mathbf{20} - 6.411064) \times 1 - 0.25339(\mathbf{20} - 29.73537) \times \underline{0} = \underline{13.897} \quad \text{Eq. 2}$$

- For ***D* = 40** days post-burning: (**bold-faced value of 40** to be inserted in eq. 3, below)

$X_2 = 1$  because  $D > T_1$  and  $X_3 = \underline{1}$  because  $D > T_2$  (*italicized values of 1 and  $\underline{1}$  to be inserted in eq. 3, below*):

$$\hat{Y}_i = -1.26000 + 2.03500 \times \mathbf{40} - 1.87970(\mathbf{40} - 6.411064) \times 1 - 0.25339(\mathbf{40} - 29.73537) \times \underline{1} = \underline{14.4019} \quad \text{Eq. 3}$$
